# Supplementary figures and images for: Type 2 diabetes mellitus duration and obesity alter the efficacy of autologously transplanted bone marrow‐derived mesenchymal stem/stromal cells
Source: PubMed Central journal article supplement — Stem Cells Transl Med. 2021 Jun 3;10(9):1266–78. doi: 10.1002/sctm.20-0506 (PMC8380443; doi:10.1002/sctm.20-0506), 2021-06-03

## Schematic visualization of the sampling design

**A**

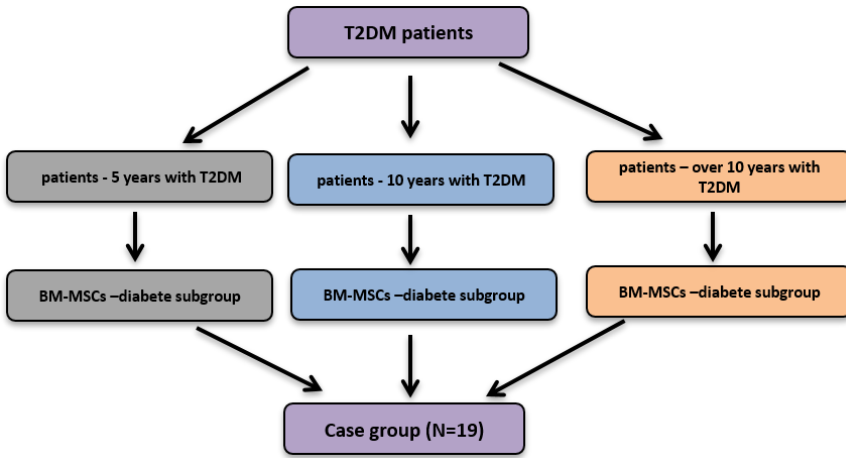

**B**

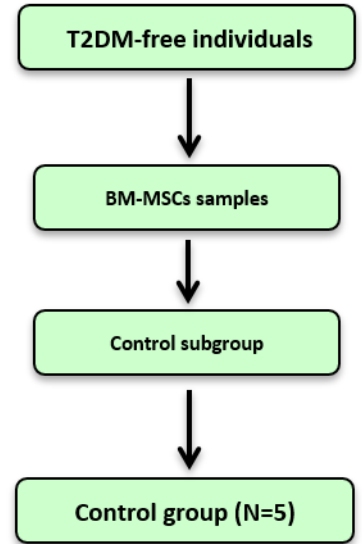

Supplement: SCT3-10-1266-s001.pdf [file SCT3-10-1266-s001.pdf]
